# Supplementary material for: Wafer-scale synthesis of thickness-controllable MoS2films via solution-processing using a dimethylformamide/n-butylamine/2-aminoethanol solvent system
Source: Royal Society of Chemistry journal article supplement (doi:10.1039/c5nr01486g), 2015-01-01
Supplement: c5nr01486g1.pdf [file c5nr01486g1.pdf]

## SUPPLEMENTARY INFORMATION

### **Wafer-scale growth of thickness-controllable MoS<sub>2</sub> films via solution-processing using a dimethylformamide/*n*-butylamine/2-aminoethanol solvent system**

Jaehyun Yang,<sup>a</sup> Yeahyun Gu,<sup>a</sup> Eunha Lee,<sup>b</sup> Hyangsook Lee,<sup>b</sup> Sang Han Park,<sup>c</sup>

Mann-Ho Cho,<sup>c</sup> Yong Ho Kim,<sup>d</sup> Yong-Hoon Kim,<sup>a,d</sup> and Hyounsub Kim\*<sup>a</sup>

<sup>a</sup> *School of Advanced Materials Science and Engineering, Sungkyunkwan University, Suwon 440-746, Republic of Korea*

<sup>b</sup> *Analytical Engineering Group, Samsung Advanced Institute of Technology (SAIT), Samsung Electronics Co., Suwon 443-803, Republic of Korea*

<sup>c</sup> *Institute of Physics and Applied Physics, Yonsei University, Seoul 120-749, Republic of Korea*

<sup>d</sup> *SKKU Advanced Institute of Nanotechnology (SAINT), Sungkyunkwan University, Suwon 440-746, Republic of Korea*

\*E-mail : [hsubkim@skku.edu](mailto:hsubkim@skku.edu)

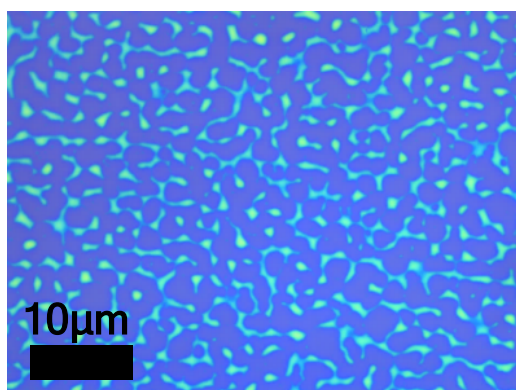

**Fig. S1** Optical microscope image of the spin-coated film on the pristine SiO<sub>2</sub> surface using a 0.024 M (NH<sub>4</sub>)<sub>2</sub>MoS<sub>4</sub> solution prepared only with a DMF solvent. After spin-coating, the sample was pre-annealed at 150 °C for 10 min in air.

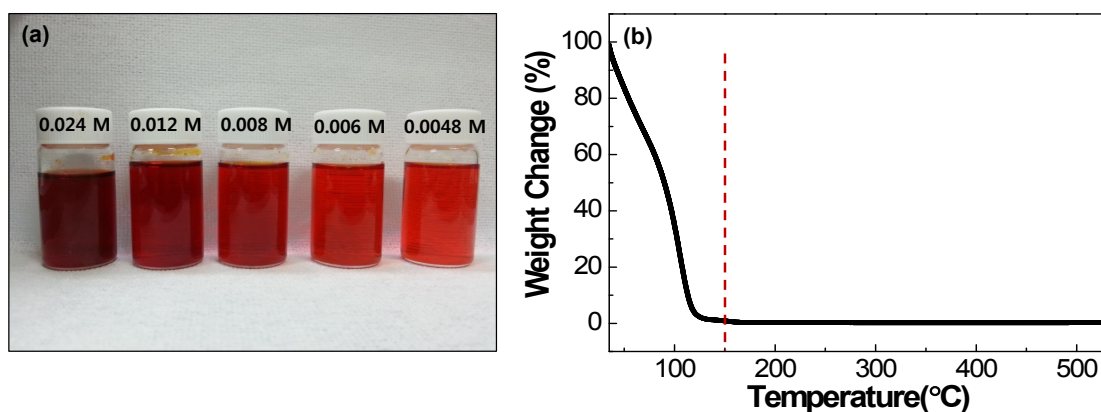

**Fig. S2** (a) A series of spin-coating solutions prepared with various (NH<sub>4</sub>)<sub>2</sub>MoS<sub>4</sub> concentrations. (b) Thermogravimetric measurement result of the spin-coating solution with a (NH<sub>4</sub>)<sub>2</sub>MoS<sub>4</sub> concentration of 0.024 M. This demonstrates that most of the solvent can be removed at the pre-annealing temperature of 150 °C (dashed line) used in this experiment.

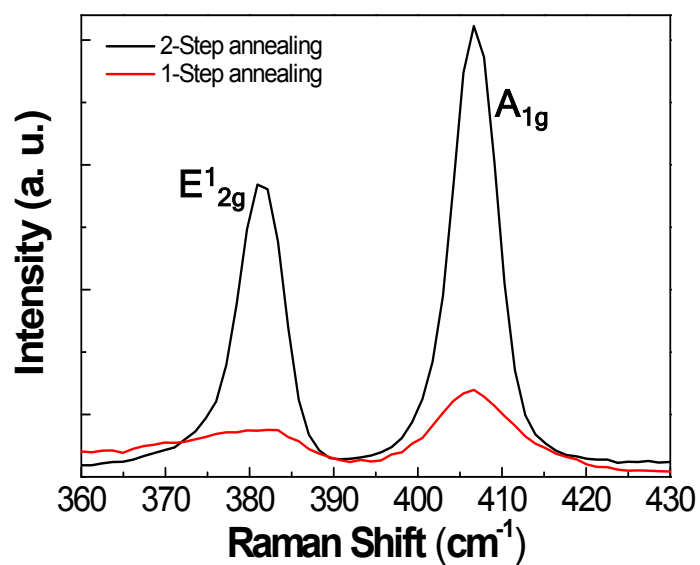

**Fig. S3** Comparison of Raman spectra measured from the spin-coated sample using a 0.024 M (NH<sub>4</sub>)<sub>2</sub>MoS<sub>4</sub> solution after the first (red line) and the second annealings (black line).

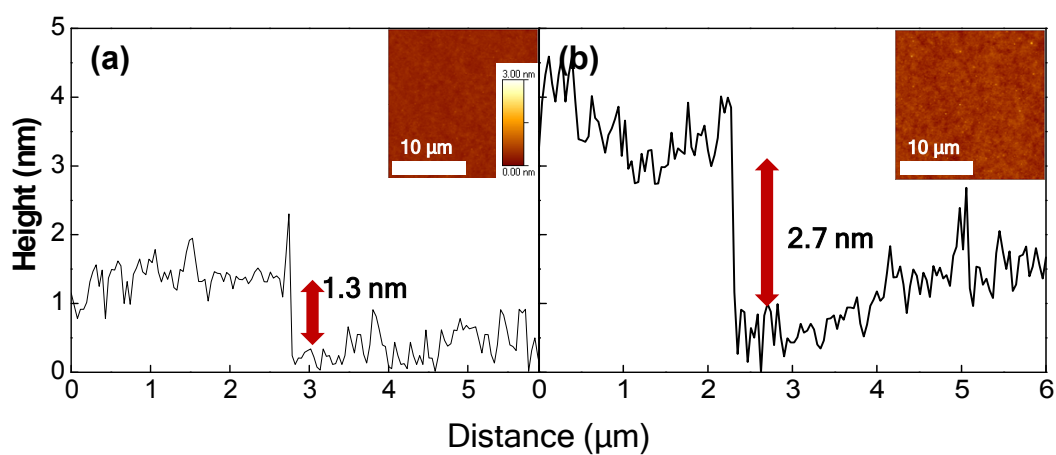

**Fig. S4** Surface topographic AFM images (insets) and cross-sectional height profiles showing the average thicknesses of the MoS<sub>2</sub> films synthesized from (a) 0.006 M and (b) 0.012 M spin-coating solutions.
